# Supplementary material for: Cerium Synchronous Doping in Anatase for Enhanced Photocatalytic Hydrogen Production from Ethanol-Water Mixtures
Source: MDPI journal article supplement (doi:10.3390/molecules28062433), 2023-03-07
Supplement: s1 [file s1]

## Supporting Information

# Cerium Synchronous Doping in Anatase for Enhanced Photocatalytic Hydrogen Production from Ethanol–Water Mixtures

Mei-Hong Tong <sup>1,2,4</sup>, Yan-Xin Chen <sup>1,2,4,5,\*</sup>, Tian-Ming Wang <sup>2,4</sup>, Shi-Wei Lin <sup>2,4</sup>, Gen Li <sup>3</sup>, Qian-Qian Zhou <sup>2,4</sup>, Rui Chen <sup>2,4</sup>, Xia Jiang <sup>2,4</sup>, Hong-Gang Liao <sup>3\*</sup> and Can-Zhong Lu <sup>2,4,5,\*</sup>

<sup>1</sup> College of Chemistry, Fuzhou University, Fuzhou, 350116, China

<sup>2</sup> CAS Key Laboratory of Design and Assembly of Functional Nanostructures, and Fujian Provincial Key Laboratory of Nanomaterials, Fujian Institute of Research on the Structure of Matter, Chinese Academy of Sciences, Fuzhou 350002, China

<sup>3</sup> State Key Laboratory of Physical Chemistry of Solid Surfaces, College of Chemistry and Chemical Engineering, Xiamen University, Xiamen 361005, China

<sup>4</sup> Xiamen Key Laboratory of Rare Earth Photoelectric Functional Materials, Xiamen Institute of Rare-Earth Materials, Haixi Institutes, Chinese Academy of Sciences, Xiamen 361021, China

<sup>5</sup> Fujian Science & Technology Innovation Laboratory for Optoelectronic Information of China, Fuzhou 350108, China

\* Correspondence: yanxinchen@fjirsm.ac.cn (Y.-X.C.); hgliao@xmu.edu.cn (H.-G.L.); czlu@fjirsm.ac.cn (C.-Z.L.)

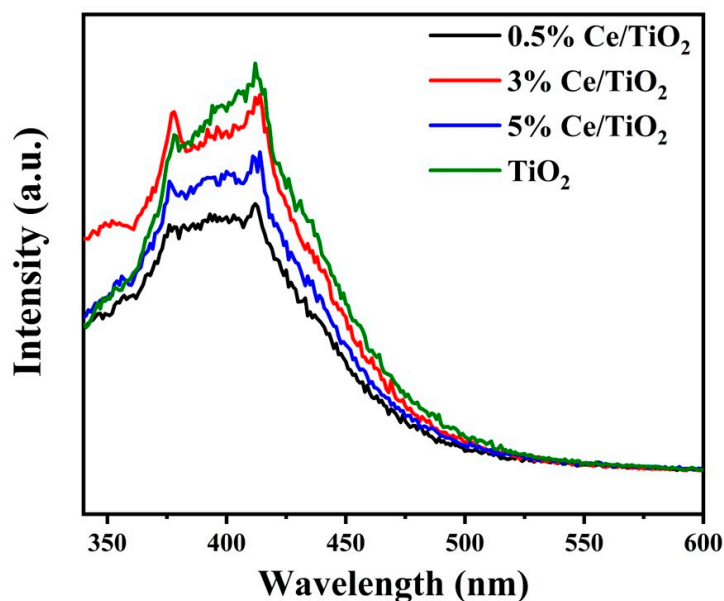

**Figure S1.** Fluorescence spectra of pure TiO<sub>2</sub>, 0.5%Ce/TiO<sub>2</sub>, 3%Ce/TiO<sub>2</sub>, and 5%Ce/TiO<sub>2</sub>.

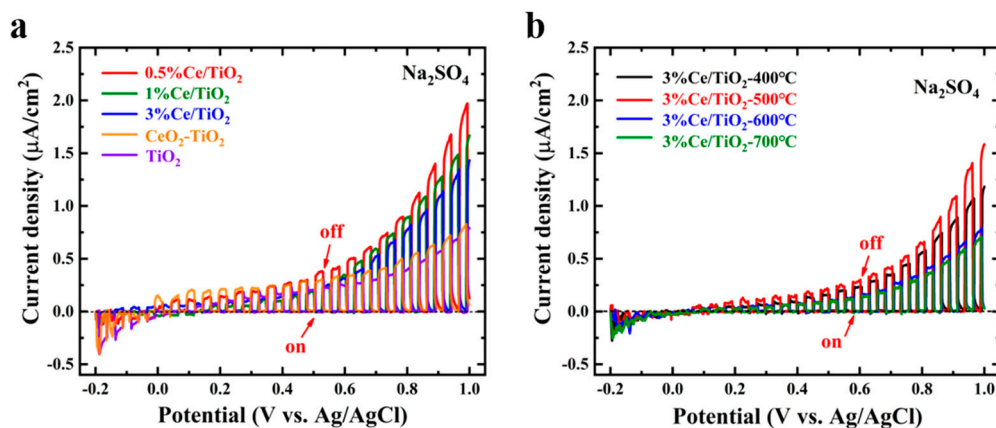

**Figure S2.** Chopped Linear sweep voltammetry (LSV) curves in 0.1M  $\text{Na}_2\text{SO}_4$  under AM 1.5G light. (a) pure  $\text{TiO}_2$ , Ce-doped  $\text{TiO}_2$  and  $\text{CeO}_2$ - $\text{TiO}_2$ , (b) 3%Ce/ $\text{TiO}_2$  annealed under different temperatures.

**Table S1.** The relative amount of Ce element obtained from ICP test.

| Sample                          | Ti<br>(ppb) | Ce<br>(ppb) | atomic ratio<br>of Ce (%) |
|---------------------------------|-------------|-------------|---------------------------|
| Ce/ $\text{TiO}_2$              | 1523        | 21          | 0.472                     |
| $\text{CeO}_2$ - $\text{TiO}_2$ | 1917        | 29          | 0.517                     |
